# Socio-demographic determinants of COVID-19 vaccine uptake in Ontario: Exploring differences across the Health Region model

Ariel Mundo Ortiz<sup>1</sup>, Bouchra Nasri<sup>1</sup>

<sup>1</sup>Centre de Recherches Mathématiques, University of Montreal, Montréal, Canada

<sup>2</sup>Department of Social and Preventive Medicine, École de Santé Publique, University of Montreal, Montréal, Canada

<sup>3</sup>Centre de recherche en santé publique, University of Montréal, Montréal, Canada

\*Corresponding author, [bouchra.nasri@umontreal.ca](mailto:bouchra.nasri@umontreal.ca)

## Abstract

The COVID-19 pandemic continues to be a worldwide public health concern. Although vaccines against this disease were rapidly developed, vaccination uptake has not been equal across all the segments of the population. In particular, it has been shown that there have been differences in vaccine uptake across different segments of the population. However, there are also differences in vaccination across geographical areas, which might be important to consider in the development of future public health vaccination policies. In this study, we examined the relationship between vaccination status (having received the first dose of a COVID-19 vaccine), and different socio-economic and geographical factors. Our results show that between October of 2021 and January of 2022, individuals from underrepresented communities were three times less likely to be vaccinated than White/Caucasian individuals across the province of Ontario in Canada, and that in some cases, within these groups, individuals in low-income brackets had significantly higher odds of vaccination when compared to their peers in high income brackets. Finally, we identified significantly lower odds of vaccination in the Central, East and West Health Regions of Ontario within certain underrepresented groups. This study shows that there is an ongoing need to better understand and address differences in vaccination uptake across diverse segments of the population of Ontario that the pandemic has largely impacted.

## Keywords

COVID-19, vaccination, survey, socio-economic factors, visible minorities, race and ethnicity

## Introduction

As of May of 2023, there have been 765 million confirmed cases of COVID-19 around the world, including 6.8 million deaths<sup>1</sup>. Although this disease is no longer categorized as a global health emergency by the World Health Organization (WHO)<sup>2</sup>, there is ongoing concern due to continued transmission, the possibility of surges in cases and deaths due to new virus variants<sup>3</sup>, and ongoing issues in health systems around the world that could be exploited by a novel virus or another public health emergency in the future<sup>4</sup>.

In particular, the pandemic showed multiple challenges with regard to vaccination. The rapid development of vaccines against COVID-19 initially brought the hope of a rapid end to the pandemic as vaccination campaigns in certain parts of the world started as early as December of 2020<sup>5-8</sup>. Although it has been estimated that so far COVID-19 vaccines have been able to prevent millions of deaths worldwide<sup>9</sup>, their implementation has faced multiple challenges across the world. These challenges included the rapid emergence of new virus variants<sup>10</sup>, the waning of vaccine protection<sup>11</sup>, inequality in vaccine access between high-income and low-income countries<sup>12,13</sup>, vaccine hesitancy<sup>14</sup>, and differences in vaccine uptake across the population<sup>15,16</sup>. More specifically, it is well established that lower vaccination uptake has been observed in individuals within certain underrepresented groups (e.g., Black, Asian, or Indigenous) as well as individuals with socio-economic disadvantages<sup>15-21</sup>.

41 Reasons given for this inequality in vaccination uptake have included medical mistrust due to systemic medical  
42 racism<sup>17,22</sup>, mistrust in vaccines<sup>15</sup>, and the existence of health misinformation and disinformation<sup>22-24</sup>. However,  
43 it is important to consider that vaccination uptake can also vary geographically across the administrative or political  
44 subdivisions within a country. For example, differences in COVID-19 vaccination rates have been associated  
45 with differences in attitudes towards vaccination in administrative areas in New York and Chicago<sup>25</sup>, scarcity of  
46 vaccination facilities in areas where underrepresented groups reside in Toronto when the provincial vaccination  
47 program started<sup>7</sup>, as well as an absence of prioritization of areas inhabited by vulnerable groups in the southeastern  
48 region of the US<sup>26</sup>. Other studies have also shown heterogeneity in vaccine uptake within counties in the US<sup>27-30</sup>,  
49 indicating that accounting for geographical differences in vaccination can help predict patterns of booster uptake  
50 in Scottish communities<sup>31</sup>. Therefore, the study of vaccination uptake across administrative or political areas can  
51 be useful to highlight differences that governments or public health agencies might need to address. However, in  
52 the case of Canada, there is a limited amount of studies that have analyzed geographical differences in vaccination.  
53 Existing studies in this area have focused on differences within certain cities, such as Toronto<sup>32</sup>, or Montréal<sup>33</sup>,  
54 or have explored differences between provinces-at-large<sup>19</sup>, but to our knowledge, there are no studies that analyze  
55 differences in vaccination uptake at the intra-provincial level. Such need is specially important in the context of  
56 Canada's pandemic response goals, which have been to minimize serious illness and deaths while minimizing societal  
57 disruption<sup>34</sup>. Analyzing differences in vaccination uptake within the provinces can aid to identify inequalities that  
58 might exist and that need to be addressed before the advent of another pandemic.

59 This need is especially important in the case of Ontario, the most populated province of Canada, and which as  
60 has a complex healthcare system. Between 2007 and 2019, Ontario managed healthcare access to its inhabitants  
61 using 14 intra-provincial divisions called the Local Health Integration Networks (LHINs), which aimed to provide an  
62 integrated health system. However, this approach was complex, bureaucratic, resulting in excessive expenditures,  
63 disparities in mortality rates, the deterioration of certain performance indicators (such as wait times and hospital  
64 readmissions), fragmented electronic health systems, and inequities in health services access<sup>35-39</sup>. With the intent of  
65 better organizing and delivering care, in late 2019 the provincial government eliminated the LHINs and incorporated  
66 the areas covered by them into six larger Health Regions (North East, North West, Central, Toronto, West, and  
67 East), which are managed by a new government agency, Ontario Health (OH)<sup>37</sup>.

68 On the other hand, public health in Ontario is administered by Public Health Ontario (PHO), a government agency  
69 established in late 2007 and that is currently composed of 34 Public Health Units (PHUs) that cover the entire  
70 geography of the province. Although PHUs were commissioned with leading the distribution of the COVID-19  
71 vaccine within their respective areas<sup>40</sup>, the vaccine rollout occurred with significant interaction between PHO and  
72 OH; in many instances both agencies had to work together to organize vaccination clinics, with personnel associated  
73 with OH also being actively involved when demand exceeded the capacity of PHO personnel, especially in rural  
74 areas<sup>41</sup>. Indeed, based on the experience of COVID-19, there are ongoing discussions on how OH and PHO will  
75 interact in the future, and the challenges that this will entail for the healthcare system of the province<sup>42</sup>.

76 Therefore, considering the relatively recent adoption of the Health Region model and its alignment with the onset  
77 of the COVID-19 pandemic, there is an ongoing need to analyze the existence of geographical disparities in vac-  
78 cination uptake within the Health Regions and identify the socio-demographic groups that might be affected, as  
79 this can serve as an indirect assessment of the state of the implementation of the new model while helping identify  
80 ongoing challenges that decision-makers might need to address to ensure the long-term success of this model and its  
81 interaction with PHO, which is specially important considering that previous research has highlighted disparities  
82 in the level of activity of each Health Region<sup>43</sup>.

83 Therefore, in this study we wanted to understand if there were differences in COVID-19 vaccination rates among  
84 the Health Regions between October 2021 and January of 2022. To contextualize these differences, we included  
85 socio-economic factors in our analysis aiming to identify which demographic groups were particularly impacted, in  
86 order to provide an assessment of the current state of healthcare access in Ontario.

## 87 **Methods**

### 88 **Data and Methods**

89 We used data from the *Survey of COVID-19 related Behaviours and Attitudes*, a repeated cross-sectional sur-  
90 vey focused on the Canadian province of Ontario that was commissioned by the Fields Institute for Research in  
91 Mathematical Sciences and the Mathematical Modelling of COVID-19 Task Force under ethical guidance from the

92 University of Toronto (under Research Ethics Board approval #40999), and which ran between September 30th,  
93 2021 and January 17th, 2022.

94 Briefly, the survey was deployed using Random Domain Intercept Technology (RDIT), a methodology for internet  
95 surveys developed by the company commissioned to run the survey (RIWI Corp., Toronto, Canada), and that has  
96 been used in the area of public health research to examine trends in vaccination rates<sup>44</sup>, ratings of care quality<sup>45</sup>,  
97 and perceptions of vaccine efficacy<sup>46</sup>. In the case of the survey used for this study, internet users whose device meta-  
98 data indicated their presence in the province of Ontario had a random chance of being redirected to the survey after  
99 they had clicked on a registered but commercially inactive web link, or after they had typed in a web address for  
100 a site that was dormant but that was temporarily managed by RIWI. Users then decided whether to anonymously  
101 participate in the survey, and those that participated were able to exit the survey at any time. After the survey  
102 closed, regardless if it was complete or incomplete, access was denied to any further users with the same internet  
103 protocol address (IP), effectively allowing each user only one opportunity to participate in the survey. Users who  
104 indicated they were under the age of 16 were exited from the survey without creating a record. Finally, the personal  
105 identifier information from each user that participated in the survey was automatically scrubbed and replaced by a  
106 unique ID.

107 Survey users entered their socio-economic information (age, income, and racial/ethnic group), and were asked  
108 information on vaccination status by using the question “Have you received the first dose of the COVID vaccine?”,  
109 with possible answers “yes” and “no” (Table 1). Of notice, the racial/ethnic and socio-economic categories from  
110 the survey did not match exactly the categories from the 2016 Census (e.g., the categories “East Asian/Pacific  
111 Islander” as well as the income bracket “over CAD 110,000” do not exist in the Census data). Therefore, we used a  
112 combination of sources to re-group certain categories and socio-economic strata in order to obtain estimates from  
113 the Census that could be used to correct the data. Further details can be found in the Appendix.

114 Additionally, the survey automatically collected the geographical location of the respondent (using the nearest  
115 municipality, as shown in Figure 1), and the date of access to the survey. The original dataset contained 39,029  
116 observations. However, the number of complete observations was much lower than the total number of observations  
117 due to the survey design, which allowed respondents to exit at any time and deployed the questions randomly. We  
118 selected the observations with complete answers (6,343 observations, or 16.25% of the total) for our analysis. It  
119 should be noted that this response rate is similar to response rates observed in previous studies that have used  
120 the same type of survey instrument, with response rates between 15% and 22%<sup>45,46</sup>. Next, we matched the city of  
121 each observation with its corresponding LHIN and Health Region, and removed observations from areas with low  
122 representation (254 observations corresponding to the North West and North East Health Regions). After all the  
123 preliminary analyses, the total number of observations used for analysis was 6,236 and included the East, Central,  
124 Toronto, and West Health Regions covering between October 1st, 2021 and January 17, 2022. The original dataset,  
125 clean dataset, and details on the data cleaning process, and data preparation are described in detail in the [GitHub](#)  
126 [repository](#) for this paper.

127 To analyze the survey data, we used a logistic regression model to examine the impact of the Health Regions in the  
128 uptake of the first dose of the vaccine, using as the variable of interest the question “Have you received the first  
129 dose of the COVID vaccine?” (with possible answers “yes” or “no”), while considering as independent variables  
130 the socio-economic factors of the participants, months covered by the survey (Table 1), and the Health Regions of  
131 OH. Furthermore, we included certain interactions (Race and Health Region and Race and income) in our model  
132 as previous studies have shown that socio-economic factors and their interactions are significant predictors of intent  
133 of vaccination and vaccination status<sup>47–49</sup>.

134 Because we identified differences between the percentage of participation within each of the socio-demographic  
135 variables collected by the survey that were considered in our analysis and the percentage within these factors in  
136 the 2016 Census (such as participation by age and racial/ethnic groups), we used an iterative proportional fitting  
137 procedure (*raking*)<sup>50</sup> to correct the percentages within each socio-demographic variable using population totals  
138 obtained from the Census and OH; later, we fitted the regression model to the uncorrected and corrected data to  
139 determine if there were any differences in the obtained estimates. Details regarding the correction can be found  
140 in the Appendix. All analyses were conducted in R 4.2.2 using the packages [survey](#)<sup>51</sup>, [tidyverse](#)<sup>52</sup>, [quarto](#)<sup>53</sup>,  
141 [modelsummary](#)<sup>54</sup>, and [gtsummary](#)<sup>55</sup>.

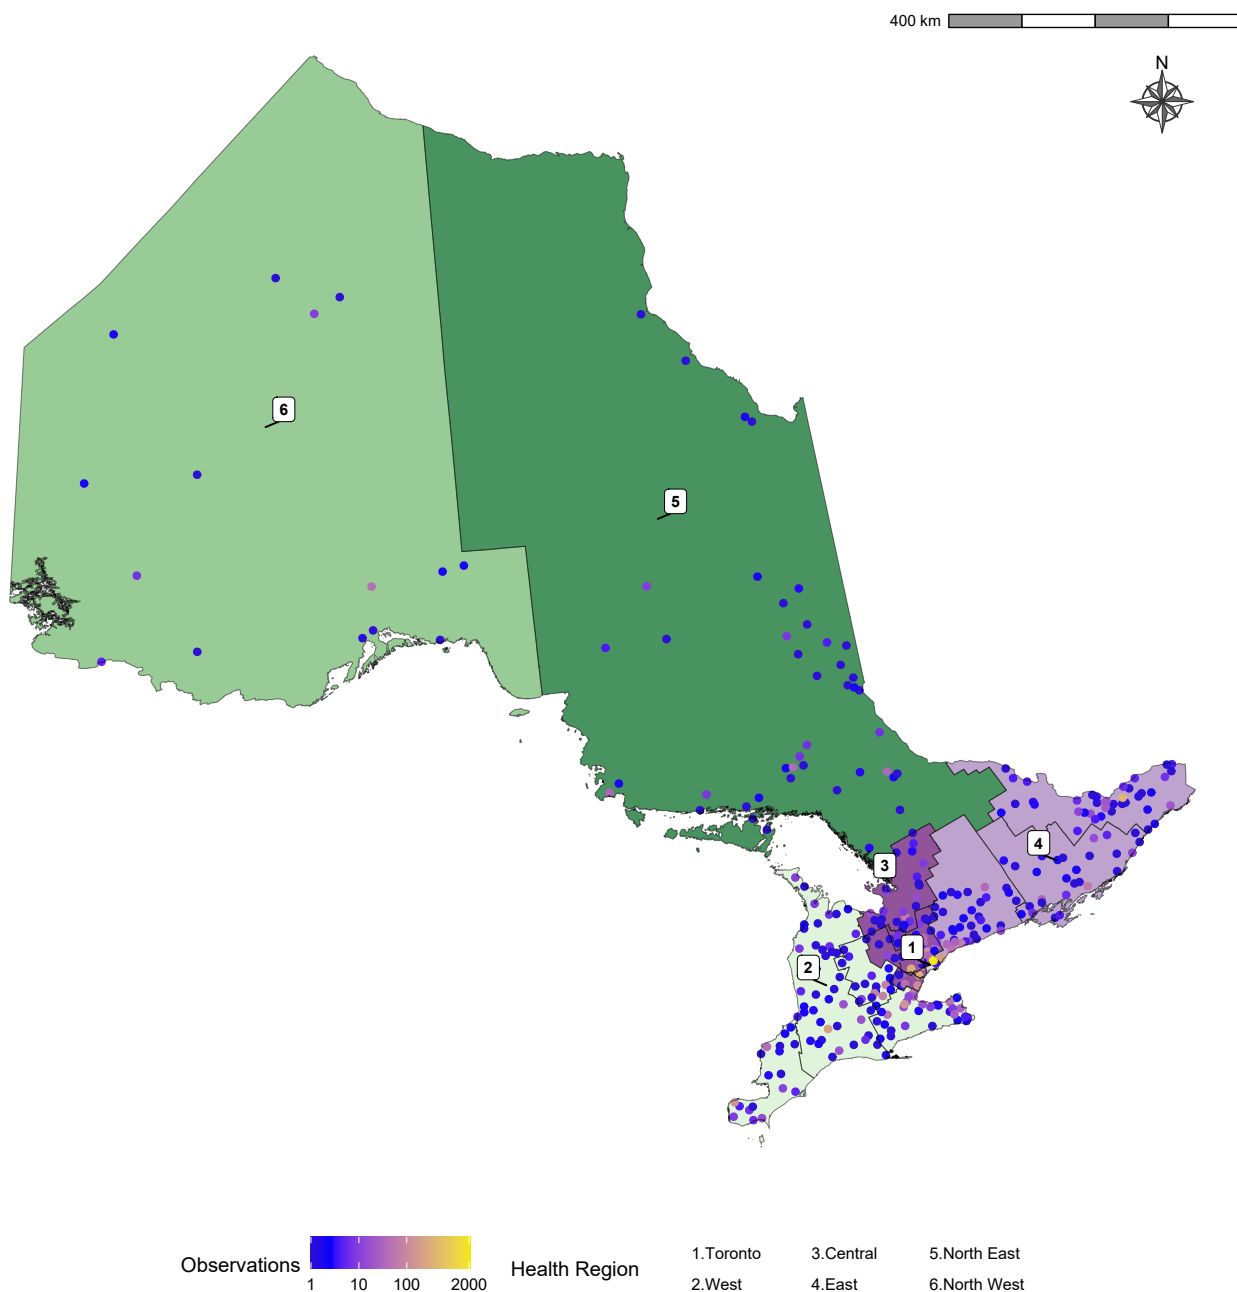

Figure 1: Geographic representation of the data collected by the *Survey of COVID-19 related Behaviours and Attitudes*, collected by the Fields Institute in Ontario. Municipalities from where survey participants provided answers appear as points, color indicates number of observation obtained from each city. The Health six Regions are color-coded and labelled sequentially. Internal boundaries within certain Health Regions indicate areas previously covered by the Local Integrated Health Networks (LHINs).

## 142 Results

### 143 Sample Characteristics

144 Table 1 shows the characteristics of the data from the Fields COVID-19 survey used for analysis. The sample  
 145 contained 6,236 observations, from which 24.8% (1,547) corresponded to individuals that reported not having  
 146 initiated a COVID-19 vaccine primary series (in other words, not having received the first dose of the vaccine).  
 147 The rate for the first dose of the vaccine ranged between 71-79% across all household income brackets, age groups,  
 148 Health Regions, and the months considered in the survey. However, the highest rate for the uptake of the first dose  
 149 of the vaccine were reported by individuals in the highest income bracket (79%), those between 16 and 34 years of  
 150 age (77%), individuals that lived in the East Health Region (77%), and during January of 2022 (78%). Between  
 151 racial/ethnic groups, White/Caucasian individuals reported the highest uptake of the first dose of the vaccine  
 152 (84%), against values that ranged between 63 and 66% in the case of Arab/Middle Eastern, Black, Indigenous,  
 153 Latin American individuals, and those that belonged to the “other” racial group category (which included Southeast  
 154 Asian, Filipino, West Asian, and minorities not identified elsewhere percentages).

Table 1: Descriptive Statistics of the Fields COVID-19 Survey (by Vaccination Status)

| Variable                    | no, N = 1,547 <sup>1</sup> | yes, N = 4,689 <sup>1</sup> |
|-----------------------------|----------------------------|-----------------------------|
| Income (CAD)                |                            |                             |
| 60000 and above             | 542 (21%)                  | 1,996 (79%)                 |
| 25000-59999                 | 347 (25%)                  | 1,046 (75%)                 |
| under 25000                 | 658 (29%)                  | 1,647 (71%)                 |
| Age Group                   |                            |                             |
| 16-34                       | 645 (23%)                  | 2,117 (77%)                 |
| 35-54                       | 411 (24%)                  | 1,305 (76%)                 |
| 55 and over                 | 491 (28%)                  | 1,267 (72%)                 |
| Health Region               |                            |                             |
| Toronto                     | 593 (26%)                  | 1,709 (74%)                 |
| Central                     | 372 (26%)                  | 1,083 (74%)                 |
| East                        | 236 (23%)                  | 783 (77%)                   |
| West                        | 346 (24%)                  | 1,114 (76%)                 |
| Month                       |                            |                             |
| October 2021                | 469 (27%)                  | 1,263 (73%)                 |
| November 2021               | 376 (28%)                  | 980 (72%)                   |
| December 2021               | 181 (24%)                  | 565 (76%)                   |
| January 2022                | 521 (22%)                  | 1,881 (78%)                 |
| Race                        |                            |                             |
| White/Caucasian             | 354 (16%)                  | 1,871 (84%)                 |
| Arab/Middle Eastern         | 111 (34%)                  | 220 (66%)                   |
| Black                       | 159 (34%)                  | 303 (66%)                   |
| East Asian/Pacific Islander | 94 (19%)                   | 404 (81%)                   |
| Indigenous                  | 112 (37%)                  | 194 (63%)                   |
| Latin American              | 99 (34%)                   | 195 (66%)                   |
| Mixed                       | 177 (30%)                  | 411 (70%)                   |
| Other <sup>2</sup>          | 315 (34%)                  | 606 (66%)                   |
| South Asian                 | 126 (21%)                  | 485 (79%)                   |

<sup>1</sup><sub>n</sub> (%)

155 <sup>2</sup>This category included Southeast Asian, Filipino, and West Asian individuals, and minorities not identified  
 elsewhere according to the 2016 Census.

### 156 Multivariate Regression

157 Figure 2 presents the estimates (as odd ratios) from the logistic regression models for vaccination status using  
 158 the socio-demographic factors collected by the survey, and their interactions for the corrected and uncorrected

159 data. Generally speaking, lower odds of vaccination were identified in both cases in individuals characterized by  
160 a low household income, or that identified as part of underrepresented groups. However, the magnitude of the  
161 estimates differed between the uncorrected and corrected models and more importantly, there were differences in  
162 the statistical significance of certain estimates before and after the correction. Specifically, the uncorrected model  
163 showed significant differences in vaccination odds between the age groups considered, the East Health Region, Latin  
164 American individuals with a household income under CAD 25,000, and Indigenous individuals living in the Central  
165 Health Region (Figure 2,B) but these were deemed non statistically significant after the correction.

166 However, significantly lower odds of vaccination were identified in the corrected model for those with a house-  
167 hold income under CAD 25,000 (OR=0.37, CI=[0.27,0.51]) and those with an income between CAD 25,000 and  
168 59,999 (OR=0.58, CI=[0.42,0.81]). Additionally, individuals who identified as Arab/Middle Eastern, Black, Latin  
169 American, of mixed background, or that belonged to other racial groups (a category that included Southeast Asian,  
170 Filipino, West Asian, and minorities not identified elsewhere), had significantly lower odds of vaccination than those  
171 in the White/Caucasian group (ORs and CIs=0.28 [0.16,0.51], 0.27 [0.16,0.45], 0.40 [0.21,0.76], 0.53 [0.30,0.92], 0.23  
172 [0.15,0.36]). Additionally, individuals that reported living in the Central and West Health Regions had higher odds  
173 of vaccination than those in the Health Region of Toronto (ORs and CIs=1.61 [1.10,2.34], and 1.59 [1.16,2.19],  
174 respectively).

175 Interestingly, individuals in underrepresented groups with a household income below CAD 25,000 had higher odds  
176 of vaccination (when compared to those with a household income above CAD 60,000). This held true in the case  
177 of Arab/Middle Eastern individuals (OR=3.4, CI=[1.70,6.79]), Black individuals (OR=3.81, CI=[2.05, 7.09]), and  
178 those in other racial or ethnic groups (OR=3.19, CI=[2.00,5.09]). Additionally, individuals with an income between  
179 CAD 25,000 and 59,999 in the Arab/Middle Eastern and other racial or ethnic groups also had higher odds of  
180 vaccination than their high-income peers (ORs and CIs=6.96 [2.67,18.16], and 3.5 [1.85,6.62]).

181 Finally, the place of habitation affected the odds of vaccination for certain underrepresented groups, as significantly  
182 lower odds of vaccination were identified for the interaction between Health Region and race in the case of Black  
183 individuals in the Central Health Region (OR=0.39, CI=[0.2,0.75]), Arab/Middle Eastern individuals in the East  
184 Health Region (OR=0.41 [0.17, 0.98]), and in the Indigenous and mixed groups in the West Health Region (ORs  
185 and CIs=[0.31 [0.14, 0.7] and 0.38 [0.19, 0.76], respectively).

## 186 Discussion

187 In this study, we wanted to understand if there were differences in COVID-19 vaccination rates among the Health  
188 Regions between October 2021 and January of 2022 while identifying the socio-demographic determinants (and their  
189 interactions) that could help predict these differences. Using the Health Regions as the base of our analysis was  
190 advantageous, as these newly implemented administrative areas match closely the geographical boundaries of the  
191 Health Regions that have been historically used to group Public Health Units in the province<sup>56,57</sup>. Thus, a Health  
192 Region-based analysis could provide information on vaccination uptake that could be useful to understand patterns  
193 within the realm of PHO and OH. Moreover, such analysis could provide an overall assessment of intra-provincial  
194 disparities that might need to be addressed moving forward by decision-makers in order to ensure that in the event  
195 of a future public health emergency or pandemic, OH and PHO will be able to work collaboratively in an efficient way  
196 having learned from the COVID-19 experience<sup>41</sup>, thus ensuring that the population of the province benefits in the  
197 long term from a robust health system.

198 Our results show that indeed, there were differences in the uptake of the first dose of the vaccine across Ontario  
199 in certain socio-demographic groups. Specifically, those who identified as Arab/Middle Eastern, Black, Latin  
200 American, having mixed racial or ethnic background, or that belonged to other groups not explicitly included in  
201 the survey (Southeast Asian, Filipino, West Asian, and minority groups not identified elsewhere) had vaccination  
202 odds that were between a third and a half of that of individuals that identified as White or Caucasian (Figure 2).  
203 These results are consistent with previous studies that have shown lower vaccination rates in individuals with the  
204 same socio-demographic characteristics<sup>19-21,58</sup>.

205 Lower vaccine uptake in the socio-demographic groups indicated above may be influenced in part, by vaccine hesi-  
206 tancy and refusal, which have been associated in underrepresented Canadian individuals with concerns on vaccine  
207 safety, effectiveness, and experiences of racial discrimination in health settings<sup>49,59-61</sup>. However, it has been shown  
208 that structural barriers also play an important role in vaccination uptake. In the case of underrepresented individu-  
209 als, such barriers include complex scheduling systems, language barriers, lack of adequate public transportation, and

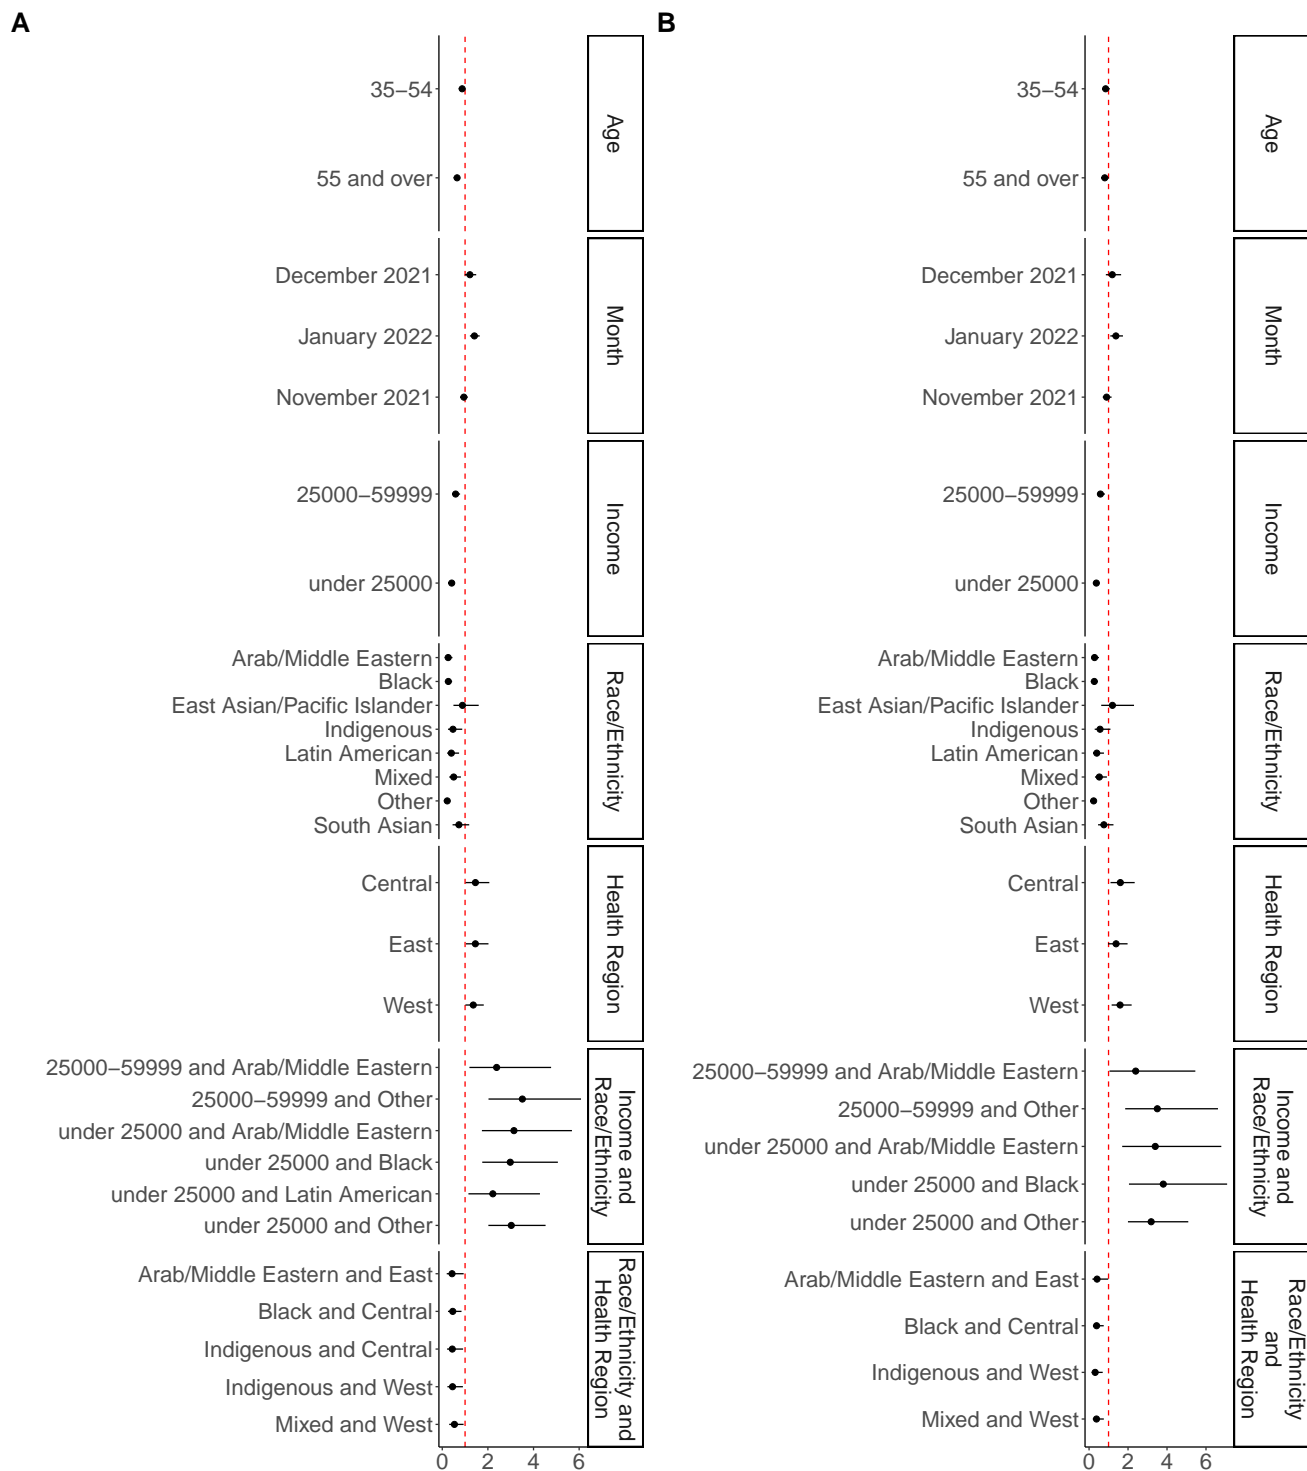

Figure 2: **A**. Coefficient estimates and confidence intervals for the uncorrected model. **B**. Coefficient estimates and confidence intervals for the corrected model. Only statistically significant interaction terms are shown in both cases. Full interaction terms can be found in Supplementary Figures A-3 and A-4.

210 lack of accessible vaccination sites<sup>62</sup>. In this regard, it is interesting to note that vaccination venues were scarce in  
211 low socio-economic areas that had the highest burden of COVID-19 in Toronto and other regions of Ontario around  
212 the time covered by the survey<sup>7,63</sup>, and that pharmacies in the Peel region (an area identified as a “hotspot” with  
213 high numbers of essential workers and multigenerational households) could not keep up with vaccine demand<sup>64</sup>.  
214 This suggests that the observed differences are associated with disparities in vaccine access that were present during  
215 the period covered by the survey.

216 Interestingly, whereas overall self-reported vaccination rates were found to be statistically significantly lower in  
217 various underrepresented groups when compared to White/Caucasian individuals, the change in odds of vaccination  
218 within certain racial groups and income strata was actually positive, in contrast to the White/Caucasian group,  
219 where vaccination odds decreased in income brackets below CAD 60,000 (Supplementary Figure A-5). Specifically,  
220 individuals in low income brackets that belonged to Arab/Middle Eastern, Black, or other minority groups had  
221 higher odds of vaccination than their peers with an income above 60,000 CAD.

222 This result likely reflects in part the fact that individuals in underrepresented groups tend to perform occupations  
223 that have been deemed as “essential” in the context of the pandemic<sup>65,66</sup>, which include workers in the areas  
224 of grocery stores, gas stations, warehouses, distribution, and manufacturing, all being occupations for which an  
225 income within the significant brackets identified in the analysis is to be expected. From one side, individuals in  
226 essential occupations in the province experienced higher rates of morbidity and mortality during the first year of the  
227 pandemic<sup>67</sup>, but later on, they had priority for COVID-19 vaccination<sup>68</sup>. Additionally, it is known that vaccination  
228 uptake in these individuals was encouraged by vaccination staff in certain parts of the province<sup>64</sup>. These facts,  
229 combined with evidence of increased trends in vaccination in this group elsewhere<sup>69</sup>, suggest that in Ontario, the  
230 type of occupation of individuals in underrepresented groups (which might have also affected their decision to get a  
231 vaccine based on their knowledge of increased risk), played an important role in the higher the odds of vaccination  
232 observed in these individuals.

233 However, the results also indicate that the place of habitation affected the odds of vaccination for certain under-  
234 represented groups (interaction term of Health Region and Race, Figure 2,B). Specifically, this held true in the  
235 case of individuals identifying as Indigenous or with mixed racial background in the West Health Region, Black  
236 individuals in the Central Health Region, and Arab/Middle Eastern individuals in the East Health Region Figure 2.  
237 For these individuals, vaccination odds were lower when compared to the Toronto Health Region (Supplementary  
238 Figure A-6). We indicate next some contributing factors that might help provide context to these results.

239 First, in this case it is useful to analyze the data considering the LHINs in each Health Region, because most studies  
240 in the literature focused on Ontario use the LHINs as the base of their analyses. The West Health Region covers  
241 the area previously occupied by the Hamilton Niagara Haldimand Brant, South West, and Waterloo Wellington  
242 LHINs, whereas the East Health Region covers the area of the former Champlain and Central East LHINs. Previous  
243 research has identified health disparities in these (mostly rural) regions, such as unequal distribution of primary  
244 care providers, increased mortality, and low pharmacist availability<sup>70-72</sup>.

245 Furthermore, there is an ongoing challenge for the health system of the province with regard to personalized  
246 healthcare for marginalized individuals. Indeed, previous studies have pointed out mistrust in the traditional  
247 healthcare system (due to systemic racism or oppression) as a rationale for lower vaccination rates in the case of  
248 Indigenous and Black individuals in Canada<sup>73,74</sup>. Other studies have also shown a need for increased culturally  
249 responsive care for other underrepresented groups such as Black women and other immigrant groups in Canada  
250 and Ontario<sup>75,76</sup>. Considering that for example, the West Health Region has only two Aboriginal Health Access  
251 Centres (community-led primary healthcare organizations focused on First Nations, Métis, and Inuit communities)  
252 to provide care to an estimated population of 100,000 Indigenous individuals living in the area<sup>77</sup>, it is possible  
253 that the limited personalized healthcare for underrepresented groups in certain parts of the province impacted  
254 vaccination uptake as well, and highlights the need of investments in the Health Regions focused on resources,  
255 infrastructure, and specially personnel that can deliver personalized care to marginalized communities, as it has  
256 been shown that such efforts have improved trust in vaccination in underrepresented groups elsewhere<sup>78</sup>.

257 There are some limitations to the present study. First, the data collection design, which allowed respondents  
258 to withdraw from the survey at any point, and that deployed the questions in a random manner resulted in  
259 an elevated number of missing observations without a definite pattern and complicated the implementation of  
260 sensitivity analyses. Therefore, we focused on entries that had complete answers, and corrected the data using  
261 population-wide information from the Census. However, more granular corrections would be needed to obtain more  
262 accurate estimates: For example, our analysis identified higher odds of vaccination in the Central and West Health



Regions, but in this case these differences are likely to be driven by the proportion of White/Caucasian individuals, who had higher vaccination rates than other racial groups. Correcting for each racial/ethnic group in each Health Region would provide a more accurate estimation of region-wide vaccination rates but unfortunately, presently this correction cannot be implemented as such stratification has not been implemented in the open data that can be obtained from the Census.

Additionally, our analysis did not consider the North West and North East Health Regions, due to the low number of entries from these areas in the survey (Figure 1). Low representation is expected as these regions as they only account for 5% of the total population of Ontario. However, these areas have the highest proportion of Indigenous inhabitants<sup>77</sup>. In the context of personalized care, there is a need to collect data that focuses on these Health Regions where additional health disparities might be present and possibly understudied.

The results in this study are based on self-reported data, where bias might be present. However, in the context of COVID-19, it has been shown that good agreement exists between self-reported and documented vaccination status<sup>79</sup>, we believe that our data was able to provide a valid sample of vaccination uptake in the province. This is supported by the statistically significant higher vaccination odds that were identified for January of 2022 in the model, which are consistent with province-wide trends reported by Public Health Ontario (which show a 4% increase between early December and January, in contrast to a 2.5% increase between October and November<sup>80</sup>); however, the short time window constitutes essentially a “snapshot” view of the evolution of the disease, and additional data would be needed to obtain estimates per racial/ethnic group over time across all Health Regions that can help inform the existence of other health disparities.

Nonetheless, the results presented here can serve as a starting point to motivate the collection of robust longitudinal data that can be used to quantify geographical and temporal differences within vulnerable segments of the population, and that can be used to inform the development of adequate public health policies within the province of Ontario or across other provinces in Canada that aim to minimize disparities in health access.

## Conclusion

The evidence collected in this study shows differences in the uptake of the first dose of the COVID-19 vaccine in Ontario between October 2021 and January 2022 in underrepresented groups, which had significantly lower odds of vaccination when compared to White/Caucasian individuals. However, although overall vaccination uptake was lower in underrepresented individuals in the province as a whole, the odds of vaccination differed within certain income levels and Health Regions in these groups. Specifically, those that reported a low household income had higher vaccination odds when compared to individuals in the same racial/ethnic group in a higher income bracket. These results highlight the complex landscape of the province, where varying degrees of rurality exist in conjunction with a socio-demographic makeup that is unique to each of the Health Regions.

Personalized care is an area that could be further developed to improve vaccination uptake in underrepresented individuals in the future. As we have shown in the discussion, there are currently a limited number of centers focused on community-led healthcare in the province. Our results showed the existence of differences in vaccination uptake between certain Health Regions and therefore, improving personalized care for underrepresented individuals can serve as a point to improve trust and facilitate vaccine access in these marginalized communities.

Overall, there are ongoing challenges for healthcare access across different segments of the population of Ontario. Future studies can be focused at more in-depth analyses of vaccination uptake within the different socio-demographic groups in each Health Region, in order to provide decision-makers with information that can serve to carefully consider and address how to improve vaccine access to marginalized communities in Ontario in the event of a future public health emergency.

## Acknowledgments

This work was supported by the Fonds de recherche du Québec Scholar Program (J1 in Artificial Intelligence and Digital Health, BN), the Natural Sciences and Engineering Research Council of Canada through the Discovery Grant Program (RGPID-560523-2020, BN), the Mathematics for Public Health (MfPH) Emerging Infectious Diseases Modelling Initiative (BN, AM), and the OMNI Emerging Infectious Disease Modelling Initiative (BN).

310 The authors thank Dr. Sarah Wilson, Medical Epidemiologist with Public Health Ontario, for her valuable comments  
311 and feedback.

## 312 Conflicts of Interest

313 The authors declare no conflict of interest.

## 314 References

- 315 1. World Health Organization Coronavirus (COVID-19) Dashboard. Accessed May 11, 2023. <https://covid19.who.int/>
- 316 2. Rigby J, Satija B. WHO declares end to COVID global health emergency. *Reuters*. Published online May 8,  
317 2023. Accessed May 11, 2022. <https://www.reuters.com/business/healthcare-pharmaceuticals/covid-is-no-longer-global-health-emergency-who-2023-05-05/>
- 318 3. Nations U. WHO chief declares end to COVID-19 as a global health emergency. *UN News*. Published online  
319 May 5, 2023. Accessed May 11, 2022. <https://news.un.org/en/story/2023/05/1136367>
- 320 4. Mackey K, Ayers CK, Kondo KK, et al. Racial and ethnic disparities in COVID-19–related infections,  
321 hospitalizations, and deaths. *Annals of Internal Medicine*. 2021;174(3):362-373. doi:10.7326/m20-6306
- 322 5. Microbe TL. COVID-19 vaccines: The pandemic will not end overnight. *The Lancet Microbe*. 2021;2(1):e1.  
323 doi:10.1016/s2666-5247(20)30226-3
- 324 6. Davis CJ, Golding M, McKay R. Efficacy information influences intention to take COVID-19 vaccine. *British  
325 Journal of Health Psychology*. 2022;27(2):300-319. doi:<https://doi.org/10.1111/bjhp.12546>
- 326 7. Bogoch II, Halani S. COVID-19 vaccines: A geographic, social and policy view of vaccination efforts in  
327 ontario, canada. *Cambridge Journal of Regions, Economy and Society*. Published online November 2022.  
328 doi:10.1093/cjres/rsac043
- 329 8. Tanne JH. Covid-19: FDA panel votes to authorise pfizer BioNTech vaccine. *BMJ*. Published online Decem-  
330 ber 2020:m4799. doi:10.1136/bmj.m4799
- 331 9. Watson OJ, Barnsley G, Toor J, Hogan AB, Winskill P, Ghani AC. Global impact of the first year of  
332 COVID-19 vaccination: A mathematical modelling study. *The Lancet Infectious Diseases*. 2022;22(9):1293-  
333 1302. doi:10.1016/s1473-3099(22)00320-6
- 334 10. Li Q, Wang J, Tang Y, Lu H. Next-generation COVID-19 vaccines: Opportunities for vaccine devel-  
335 opment and challenges in tackling COVID-19. *Drug Discoveries & Therapeutics*. 2021;15(3):118-123.  
336 doi:10.5582/ddt.2021.0105
- 337 11. Dolgin E. COVID vaccine immunity is waning — how much does that matter? *Nature*. 2021;597(7878):606-  
338 607. doi:10.1038/d41586-021-02532-4
- 339 12. Gerretsen P, Kim J, Caravaggio F, et al. Individual determinants of COVID-19 vaccine hesitancy. Inbaraj  
340 LR, ed. *PLOS ONE*. 2021;16(11):e0258462. doi:10.1371/journal.pone.0258462
- 341 13. Yamey G, Garcia P, Hassan F, et al. It is not too late to achieve global covid-19 vaccine equity. *BMJ*.  
342 Published online March 2022:e070650. doi:10.1136/bmj-2022-070650
- 343 14. Nafilyan V, Dolby T, Razieh C, et al. Sociodemographic inequality in COVID-19 vaccination cover-  
344 age among elderly adults in england: A national linked data study. *BMJ Open*. 2021;11(7):e053402.  
345 doi:10.1136/bmjopen-2021-053402
- 346 15. Willis DE, Andersen JA, Bryant-Moore K, et al. COVID-19 vaccine hesitancy: Race/ethnicity, trust, and  
347 fear. *Clinical and Translational Science*. 2021;14(6):2200-2207. doi:10.1111/cts.13077
- 348 16. Skirrow H, Barnett S, Bell S, et al. Women’s views on accepting COVID-19 vaccination during and af-  
349 ter pregnancy, and for their babies: A multi-methods study in the UK. *BMC Pregnancy and Childbirth*.  
350 2022;22(1). doi:10.1186/s12884-021-04321-3
- 351 17. Stoler J, Enders AM, Klofstad CA, Uscinski JE. The limits of medical trust in mitigating COVID-19  
352 vaccine hesitancy among black americans. *Journal of General Internal Medicine*. 2021;36(11):3629-3631.  
353 doi:10.1007/s11606-021-06743-3

- 349 18. Khubchandani J, Sharma S, Price JH, Wiblishauser MJ, Sharma M, Webb FJ. COVID-19 vaccination hesi-  
tancy in the united states: A rapid national assessment. *Journal of Community Health*. 2021;46(2):270-277.  
350 doi:[10.1007/s10900-020-00958-x](https://doi.org/10.1007/s10900-020-00958-x)
- 351 19. Guay M, Maquiling A, Chen R, et al. Measuring inequalities in COVID-19 vaccination uptake and intent: Re-  
sults from the canadian community health survey 2021. *BMC Public Health*. 2022;22(1). doi:[10.1186/s12889-022-14090-z](https://doi.org/10.1186/s12889-022-14090-z)
- 352 20. Muhajarine N, Adeyinka DA, McCutcheon J, Green KL, Fahlman M, Kallio N. COVID-19 vaccine hesitancy  
and refusal and associated factors in an adult population in saskatchewan, canada: Evidence from predictive  
353 modelling. Gesser-Edelsburg A, ed. *PLOS ONE*. 2021;16(11):e0259513. doi:[10.1371/journal.pone.0259513](https://doi.org/10.1371/journal.pone.0259513)
- 354 21. Hussain B, Latif A, Timmons S, Nkhoma K, Nellums LB. Overcoming COVID-19 vaccine hesitancy  
among ethnic minorities: A systematic review of UK studies. *Vaccine*. 2022;40(25):3413-3432.  
355 doi:[10.1016/j.vaccine.2022.04.030](https://doi.org/10.1016/j.vaccine.2022.04.030)
- 356 22. Mosby I, Swidrovich J. Medical experimentation and the roots of COVID-19 vaccine hesitancy among  
357 indigenous peoples in canada. *Canadian Medical Association Journal*. 2021;193(11):E381-E383.  
doi:[10.1503/cmaj.210112](https://doi.org/10.1503/cmaj.210112)
- 358 23. Bogart LM, Ojikutu BO, Tyagi K, et al. COVID-19 related medical mistrust, health impacts, and potential  
359 vaccine hesitancy among black americans living with HIV. *JAIDS Journal of Acquired Immune Deficiency  
Syndromes*. 2021;86(2):200-207. doi:[10.1097/qai.0000000000002570](https://doi.org/10.1097/qai.0000000000002570)
- 360 24. Freeman D, Loe BS, Chadwick A, et al. COVID-19 vaccine hesitancy in the UK: The oxford coronavirus  
361 explanations, attitudes, and narratives survey (oceans) II. *Psychological Medicine*. 2020;52(14):3127-3141.  
doi:[10.1017/s0033291720005188](https://doi.org/10.1017/s0033291720005188)
- 362 25. Malik AA, McFadden SM, Elharake J, Omer SB. Determinants of COVID-19 vaccine acceptance in the US.  
363 *EClinicalMedicine*. 2020;26:100495. doi:[10.1016/j.eclinm.2020.100495](https://doi.org/10.1016/j.eclinm.2020.100495)
- 364 26. Nguyen KH, Nguyen K, Corlin L, Allen JD, Chung M. Changes in COVID-19 vaccination receipt and  
365 intention to vaccinate by socioeconomic characteristics and geographic area, united states, january 6 – march  
29, 2021. *Annals of Medicine*. 2021;53(1):1419-1428. doi:[10.1080/07853890.2021.1957998](https://doi.org/10.1080/07853890.2021.1957998)
- 366 27. Mollalo A, Tatar M. Spatial modeling of COVID-19 vaccine hesitancy in the united states. *International  
367 Journal of Environmental Research and Public Health*. 2021;18(18):9488. doi:[10.3390/ijerph18189488](https://doi.org/10.3390/ijerph18189488)
- 368 28. Yang TC, Matthews SA, Sun F. Multiscale dimensions of spatial process: COVID-19 fully vac-  
369 cinated rates in u.s. counties. *American Journal of Preventive Medicine*. 2022;63(6):954-961.  
doi:[10.1016/j.amepre.2022.06.006](https://doi.org/10.1016/j.amepre.2022.06.006)
- 370 29. Tiu A, Susswein Z, Merritt A, Bansal S. Characterizing the spatiotemporal heterogeneity of the  
371 COVID-19 vaccination landscape. *American Journal of Epidemiology*. 2022;191(10):1792-1802.  
doi:[10.1093/aje/kwac080](https://doi.org/10.1093/aje/kwac080)
- 372 30. Bhuiyan MAN, Davis TC, Arnold CL, et al. Using the social vulnerability index to assess COVID-19 vaccine  
373 uptake in louisiana. *GeoJournal*. Published online December 2022. doi:[10.1007/s10708-022-10802-5](https://doi.org/10.1007/s10708-022-10802-5)
- 374 31. Wood AJ, MacKintosh AM, Stead M, Kao RR. Predicting future spatial patterns in COVID-19 booster  
375 vaccine uptake. Published online September 2022. doi:[10.1101/2022.08.30.22279415](https://doi.org/10.1101/2022.08.30.22279415)
- 376 32. Choi KH, Denice PA, Ramaj S. Vaccine and COVID-19 trajectories. *Socius: Sociological Research for a  
377 Dynamic World*. 2021;7:237802312110529. doi:[10.1177/23780231211052946](https://doi.org/10.1177/23780231211052946)
- 378 33. McKinnon B, Quach C, Dubé Ève, Nguyen CT, Zinszer K. Social inequalities in COVID-19 vaccine ac-  
379 ceptance and uptake for children and adolescents in montreal, canada. *Vaccine*. 2021;39(49):7140-7145.  
doi:[10.1016/j.vaccine.2021.10.077](https://doi.org/10.1016/j.vaccine.2021.10.077)
- 380 34. National Advisory Committee on Immunization (NACI). *Guidance on an Additional COVID-19 Booster  
381 Dose in the Spring of 2023 for Individuals at High Risk of Severe Illness Due to COVID-19*. Public  
Health Agency of Canada; 2023. [https://www.canada.ca/en/public-health/services/publications/vaccines-  
immunization/national-advisory-committee-immunization-guidance-additional-covid-19-booster-dose-  
spring-2023-individuals-high-risk-severe-illness-due-covid-19.html](https://www.canada.ca/en/public-health/services/publications/vaccines-immunization/national-advisory-committee-immunization-guidance-additional-covid-19-booster-dose-spring-2023-individuals-high-risk-severe-illness-due-covid-19.html)
- 382 35. Tsasis P, Evans JM, Owen S. Reframing the challenges to integrated care: A complex-adaptive systems  
383 perspective. *International Journal of Integrated Care*. 2012;12(5). doi:[10.5334/ijic.843](https://doi.org/10.5334/ijic.843)
- 384

- 385 36. Muratov S, Lee J, Holbrook A, et al. Regional variation in healthcare spending and mortality among senior  
high-cost healthcare users in ontario, canada: A retrospective matched cohort study. *BMC Geriatrics*.  
386 2018;18(1). doi:[10.1186/s12877-018-0952-7](https://doi.org/10.1186/s12877-018-0952-7)
- 387 37. Dong L, Sahu R, Black R. Governance in the transformational journey toward integrated healthcare:  
The case of ontario. *Journal of Information Technology Teaching Cases*. Published online December  
388 2022;204388692211473. doi:[10.1177/20438869221147313](https://doi.org/10.1177/20438869221147313)
- 389 38. Auditor General of Ontario O of the, ed. Annual Report 2015. In: *Section 3.08: LHINs - Local Health  
Integration Networks*. Queen's Printer for Ontario; 2015. Accessed May 12, 2023. [https://www.auditor.on.  
390 ca/en/content/annualreports/arreports/en15/3.08en15.pdf](https://www.auditor.on.ca/en/content/annualreports/arreports/en15/3.08en15.pdf)
- 391 39. Auditor General of Ontario O of the, ed. Annual Report 2016. In: *Section 3.03: Electronic Health Records'  
Implementation Status*. Queen's Printer for Ontario; 2016. Accessed May 12, 2023. [https://www.auditor.  
392 on.ca/en/content/annualreports/arreports/en16/v1\\_303en16.pdf](https://www.auditor.on.ca/en/content/annualreports/arreports/en16/v1_303en16.pdf)
- 393 40. Rotenberg S, Downer MB, Brown H, et al. *COVID-19 Vaccination for People with Disabilities*. Ontario  
COVID-19 Science Advisory Table; 2021. doi:[10.47326/ocsat.2021.02.35.1.0](https://doi.org/10.47326/ocsat.2021.02.35.1.0)
- 394 41. Ashcroft R, Donnelly C, Lam S, et al. A qualitative examination of primary care team's participation in the  
distribution of the COVID-19 vaccination. Published online June 2023. doi:[10.21203/rs.3.rs-3016276/v1](https://doi.org/10.21203/rs.3.rs-3016276/v1)
- 395 42. Dion A, Waddell K, Moat K, Reid R, Lavis J. *Rapid Synthesis: Examining the Intersec-  
tions Between Ontario Health Teams and Public Health*. McMaster Health Forum; 2022.  
396 [https://www.mcmasterforum.org/docs/default-source/product-documents/rapid-responses/examining-  
397 the-intersections-between-ontario-health-teams-and-public-health.pdf?sfvrsn=69caa8c9\\_11](https://www.mcmasterforum.org/docs/default-source/product-documents/rapid-responses/examining-the-intersections-between-ontario-health-teams-and-public-health.pdf?sfvrsn=69caa8c9_11)
- 398 43. Sethuram C, McCutcheon T, Liddy C. An environmental scan of ontario health teams: A descriptive study.  
399 *BMC Health Services Research*. 2023;23(1). doi:[10.1186/s12913-023-09102-6](https://doi.org/10.1186/s12913-023-09102-6)
- 400 44. Sargent RH, Laurie S, Weakland LF, et al. Use of random domain intercept technology to track COVID-19  
401 vaccination rates in real time across the united states: Survey study. *Journal of Medical Internet Research*.  
2022;24(7):e37920. doi:[10.2196/37920](https://doi.org/10.2196/37920)
- 402 45. Kim JH, Bell GA, Ratcliffe HL, et al. Predictors of patient-reported quality of care in low- and middle-income  
403 countries: A four-country survey of person-centered care. *International Journal for Quality in Health Care*.  
2021;33(3). doi:[10.1093/intqhc/mzab110](https://doi.org/10.1093/intqhc/mzab110)
- 404 46. Seeman N, Ing A, Rizo C. Assessing and responding in real time to online anti-vaccine sentiment during a  
405 flu pandemic. *Healthcare Quarterly*. 2010;13(sp):8-15. doi:[10.12927/hcq.2010.21923](https://doi.org/10.12927/hcq.2010.21923)
- 406 47. Nguyen KH, Anneser E, Toppo A, Allen JD, Parott JS, Corlin L. Disparities in national and state estimates  
407 of COVID-19 vaccination receipt and intent to vaccinate by race/ethnicity, income, and age group among  
adults  $\geq 18$  years, united states. *Vaccine*. 2022;40(1):107-113. doi:[10.1016/j.vaccine.2021.11.040](https://doi.org/10.1016/j.vaccine.2021.11.040)
- 408 48. Shih SF, Wagner AL, Masters NB, Prosser LA, Lu Y, Zikmund-Fisher BJ. Vaccine hesitancy and re-  
409 jection of a vaccine for the novel coronavirus in the united states. *Frontiers in Immunology*. 2021;12.  
doi:[10.3389/fimmu.2021.558270](https://doi.org/10.3389/fimmu.2021.558270)
- 410 49. Cénat JM, Noorishad PG, Farahi SMMM, et al. Prevalence and factors related to COVID-19 vaccine  
411 hesitancy and unwillingness in canada: A systematic review and meta-analysis. *Journal of Medical Virology*.  
2022;95(1). doi:[10.1002/jmv.28156](https://doi.org/10.1002/jmv.28156)
- 412 50. Deming WE, Stephan FF. On a least squares adjustment of a sampled frequency table when the  
413 expected marginal totals are known. *The Annals of Mathematical Statistics*. 1940;11(4):427-444.  
doi:[10.1214/aoms/1177731829](https://doi.org/10.1214/aoms/1177731829)
- 414 51. Lumley T. *Complex Surveys*. John Wiley & Sons; 2011.
- 415 52. Wickham H, Averick M, Bryan J, et al. Welcome to the tidyverse. *Journal of Open Source Software*.  
416 2019;4(43):1686. doi:[10.21105/joss.01686](https://doi.org/10.21105/joss.01686)
- 417 53. Allaire J. *Quarto: R Interface to 'Quarto' Markdown Publishing System.*; 2022. [https://CRAN.R-project.  
418 org/package=quarto](https://CRAN.R-project.org/package=quarto)
- 419 54. Arel-Bundock V. modelsummary: Data and model summaries in R. *Journal of Statistical Software*.  
420 2022;103(1):1-23. doi:[10.18637/jss.v103.i01](https://doi.org/10.18637/jss.v103.i01)
- 421  
422

- 423 55. Sjoberg DD, Whiting K, Curry M, Lavery JA, Larmarange J. Reproducible summary tables with the gtsummary package. *The R Journal*. 2021;13:570-580. doi:10.32614/RJ-2021-053
- 424
- 425 56. Bolotin JJAG Shelly AND Feld. Population-based estimate of hepatitis c virus prevalence in ontario, canada. *PLOS ONE*. 2018;13(1):1-10. doi:10.1371/journal.pone.0191184
- 426
- 427 57. Ontario HIV Epidemiology and Surveillance Initiative. Technical Notes: Health regions - OHESI — ohesi.ca. Accessed July 7, 2023. <https://www.ohesi.ca/technical-notes/health-regions/>
- 428
- 429 58. Carter MA, Biro S, Maier A, Shingler C, Guan TH. COVID-19 vaccine uptake in southeastern ontario, canada: Monitoring and addressing health inequities. *Journal of Public Health Management and Practice*. 2022;28(6):615-623. doi:10.1097/phh.0000000000001565
- 430
- 431 59. Basta NE, Sohel N, Sulis G, et al. Factors associated with willingness to receive a COVID-19 vaccine among 23, 819 adults aged 50 years or older: An analysis of the canadian longitudinal study on aging. *American Journal of Epidemiology*. 2022;191(6):987-998. doi:10.1093/aje/kwac029
- 432
- 433 60. Cénat JM, Noorishad PG, Bakombo SM, et al. A systematic review on vaccine hesitancy in black communities in canada: Critical issues and research failures. *Vaccines*. 2022;10(11):1937. doi:10.3390/vaccines10111937
- 434
- 435 61. Cénat JM, Farahi SMMM, Bakombo SM, et al. Vaccine mistrust among black individuals in canada: The major role of health literacy, conspiracy theories, and racial discrimination in the healthcare system. *Journal of Medical Virology*. 2023;95(4). doi:10.1002/jmv.28738
- 436
- 437 62. Njoku A, Joseph M, Felix R. Changing the narrative: Structural barriers and racial and ethnic inequities in COVID-19 vaccination. *International Journal of Environmental Research and Public Health*. 2021;18(18):9904. doi:10.3390/ijerph18189904
- 438
- 439 63. Iveniuk J, Leon S. *Uneven Recovery: Measuring Covid-19 Vaccine Equity in Ontario*. Wellesley Institute; 2021. Accessed May 12, 2023. <https://www.wellesleyinstitute.com/wp-content/uploads/2021/04/An-uneven-recovery-Measuring-COVID-19-vaccine-equity-in-Ontario.pdf>
- 440
- 441 64. Gill M, Datta D, Gregory P, Austin Z. COVID-19 vaccination in high-risk communities: Case study of brampton, ontario. *Canadian Pharmacists Journal / Revue des Pharmaciens du Canada*. 2022;155(6):345-351. doi:10.1177/17151635221123042
- 442
- 443 65. Hawkins D. Differential occupational risk for COVID-19 and other infection exposure according to race and ethnicity. *American Journal of Industrial Medicine*. 2020;63(9):817-820. doi:10.1002/ajim.23145
- 444
- 445 66. Côté D, Durant S, MacEachen E, et al. A rapid scoping review of COVID-19 and vulnerable workers: Intersecting occupational and public health issues. *American Journal of Industrial Medicine*. 2021;64(7):551-566. doi:10.1002/ajim.23256
- 446
- 447 67. Rao A, Ma H, Moloney G, et al. A disproportionate epidemic: COVID-19 cases and deaths among essential workers in toronto, canada. *Annals of Epidemiology*. 2021;63:63-67. doi:10.1016/j.annepidem.2021.07.010
- 448
- 449 68. Mishra S, Stall NM, Ma H, et al. *A Vaccination Strategy for Ontario COVID-19 Hotspots and Essential Workers*. Ontario COVID-19 Science Advisory Table; 2021. doi:10.47326/ocsat.2021.02.26.1.0
- 450
- 451 69. Nguyen KH, Yankey D, Coy KC, et al. COVID-19 vaccination coverage, intent, knowledge, attitudes, and beliefs among essential workers, united states. *Emerging Infectious Diseases*. 2021;27(11):2908-2913. doi:10.3201/eid2711.211557
- 452
- 453 70. Shah TI, Clark AF, Seabrook JA, Sibbald S, Gilliland JA. Geographic accessibility to primary care providers: Comparing rural and urban areas in southwestern ontario. *The Canadian Geographer / Le Géographe canadien*. 2019;64(1):65-78. doi:10.1111/cag.12557
- 454
- 455 71. Crighton EJ, Ragetlie R, Luo J, To T, Gershon A. A spatial analysis of COPD prevalence, incidence, mortality and health service use in ontario. *Health Rep*. 2015;26(3):10-18.
- 456
- 457 72. Timony P, Houle SKD, Gauthier A, Waite NM. Geographic distribution of ontario pharmacists: A focus on rural and northern communities. *Canadian Pharmacists Journal / Revue des Pharmaciens du Canada*. 2022;155(5):267-276. doi:10.1177/17151635221115411
- 458
- 459 73. Smylie J, McConkey S, Rachlis B, et al. Uncovering SARS-COV-2 vaccine uptake and COVID-19 impacts among first nations, inuit and métis peoples living in toronto and london, ontario. *Canadian Medical Association Journal*. 2022;194(29):E1018-E1026. doi:10.1503/cmaj.212147
- 460

- 461 74. Eissa A, Lofters A, Akor N, Prescod C, Nnorom O. Increasing SARS-CoV-2 vaccination rates  
among black people in canada. *Canadian Medical Association Journal*. 2021;193(31):E1220-E1221.  
462 doi:[10.1503/cmaj.210949](https://doi.org/10.1503/cmaj.210949)
- 463 75. Etowa J, Hyman I. Unpacking the health and social consequences of COVID-19 through a race, migration  
and gender lens. *Canadian Journal of Public Health*. 2021;112(1):8-11. doi:[10.17269/s41997-020-00456-6](https://doi.org/10.17269/s41997-020-00456-6)
- 464 76. Patel A, Dean J, Edge S, Wilson K, Ghassemi E. Double burden of rural migration in canada? Considering  
465 the social determinants of health related to immigrant settlement outside the cosmopolis. *International  
Journal of Environmental Research and Public Health*. 2019;16(5):678. doi:[10.3390/ijerph16050678](https://doi.org/10.3390/ijerph16050678)
- 466 77. *Annual Business Plan 2022/23*. Ontario Health; [https://www.ontariohealth.ca/sites/ontariohealth/files/  
467 2022-05/OHBusinessPlan22\\_23.pdf](https://www.ontariohealth.ca/sites/ontariohealth/files/2022-05/OHBusinessPlan22_23.pdf); 2022.
- 468 78. DeRoo SS, Pudalov NJ, Fu LY. Planning for a COVID-19 vaccination program. *JAMA*. 2020;323(24):2458.  
469 doi:[10.1001/jama.2020.8711](https://doi.org/10.1001/jama.2020.8711)
- 470 79. Stephenson M, Olson SM, Self WH, et al. Ascertainment of vaccination status by self-report versus source  
471 documentation: Impact on measuring COVID-19 vaccine effectiveness. *Influenza and Other Respiratory  
Viruses*. 2022;16(6):1101-1111. doi:[10.1111/irv.13023](https://doi.org/10.1111/irv.13023)
- 472 80. Ontario COVID-19 Data Tool. Accessed February 27, 2023. [https://www.publichealthontario.ca/en/data-  
473 and-analysis/infectious-disease/covid-19-data-surveillance/covid-19-data-tool?tab=vaccine](https://www.publichealthontario.ca/en/data-and-analysis/infectious-disease/covid-19-data-surveillance/covid-19-data-tool?tab=vaccine)
- 474
